# Supplementary material for: Magnesium and zinc complexes bearing NNO-tridentate ketiminate ligands: synthesis, structures and catalysis in the ring-opening polymerization of lactides
Source: Royal Society of Chemistry journal article supplement (doi:10.1039/c8dt00888d), 2018-01-01
Supplement: c8dt00888d1.pdf [file c8dt00888d1.pdf]

## Supporting Information

Magnesium and zinc complexes bearing NNO-tridentate ketiminate ligands:  
synthesis, structures and catalysis in ring-opening polymerization of lactides

Yong Huang\*, Xin Kou, Yu-Lai Duan, Fei-Fei Ding, Yi-Fan Yin, Wei Wang, Ying Yang\*

*Key Laboratory of Nonferrous Metals Chemistry and Resources Utilization of Gansu Province, College of Chemistry and Chemical Engineering, Lanzhou University, Lanzhou 730000, Gansu, P. R. China*

1. Table S1. Crystal data and structure refinement for complexes 1, 3, 4.....S2
2. Table S2. Crystal data and structure refinement for complexes 7, 11, 14.....S3
3. Fig. S1 MALDI-TOF spectrum of the oligo(L-lactide)s PLLA-15 prepared by complex 5.....S4
4. Fig. S2 Plots of  $\ln([rac-LA]_0/[rac-LA]_t)$  versus time catalyzed by 1 (■), 2 (▲) and 3 (●).....S4
5. Fig. S3 Plots of  $\ln([rac-LA]_0/[rac-LA]_t)$  versus time catalyzed by 4(■), 5 (●) and 6 (▲).....S5
6. Fig. S4  $^1\text{H}$  NMR spectrum of PLLA-50 catalyzed by  $[\text{Mg}(\text{L}^1)_2]$  (7).....S5
7. Fig. S5  $^1\text{H}$  NMR spectroscopic studies of reaction of  $[\text{Mg}(\text{L}^1)_2]$  (7) with 2 equiv of BnOH.....S6

**Table S1.** Crystal data and structure refinement for complexes **1**, **3**, **4**.

| complex                           | $[(L^1)_2Mg_2(\mu-OBn)_2]$ ( <b>1</b> )      | $[(L^3)_2Mg_2(\mu-OBn)_2]$ ( <b>3</b> )      | $[(L^1)_2Zn_2(\mu-OBn)_2]$ ( <b>4</b> )      |
|-----------------------------------|----------------------------------------------|----------------------------------------------|----------------------------------------------|
| Empirical formula                 | $C_{46}H_{56}Mg_2N_8O_4$                     | $C_{50}H_{64}Mg_2N_8O_4$                     | $C_{46}H_{56}N_8O_4Zn_2$                     |
| Formula weight                    | 833.60                                       | 889.71                                       | 915.72                                       |
| Temperature                       | 296(2) K                                     | 296(2) K                                     | 173.01(10) K                                 |
| Wavelength                        | 0.71073 Å                                    | 0.71073 Å                                    | 0.71073 Å                                    |
| Crystal system                    | Triclinic                                    | Monoclinic                                   | Triclinic                                    |
| Space group                       | P-1                                          | P2(1)/C                                      | P-1                                          |
| $a/\text{Å}$                      | 9.2905(4)                                    | 11.9373(4)                                   | 9.2699(5)                                    |
| $\beta/\text{Å}$                  | 11.3860(5)                                   | 18.0926(6)                                   | 11.3956(8)                                   |
| $\gamma/\text{Å}$                 | 11.8181(5)                                   | 11.3573(4)                                   | 11.5913(8)                                   |
| $a^\circ$                         | 87.612(2)                                    | 90                                           | 86.719(6)                                    |
| $b^\circ$                         | 78.857(2)                                    | 99.666(2)                                    | 78.539(5)                                    |
| $c^\circ$                         | 67.979(2)                                    | 90°                                          | 67.563(6)                                    |
| Volume                            | 1136.44(9) Å <sup>3</sup>                    | 2418.09(14) Å <sup>3</sup>                   | 1108.97(13) Å <sup>3</sup>                   |
| Z                                 | 1                                            | 2                                            | 1                                            |
| Density (calculated)              | 1.218 Mg/m <sup>3</sup>                      | 1.222 Mg/m <sup>3</sup>                      | 1.371 Mg/m <sup>3</sup>                      |
| Absorption coefficient            | 0.104 mm <sup>-1</sup>                       | 0.102 mm <sup>-1</sup>                       | 1.134 mm <sup>-1</sup>                       |
| F(000)                            | 444                                          | 952                                          | 480                                          |
| Crystal size                      | 0.12 x 0.10 x 0.08 mm <sup>3</sup>           | 0.20 x 0.15 x 0.12 mm <sup>3</sup>           | 0.25 x 0.20 x 0.18 mm <sup>3</sup>           |
| Theta range for data collection   | 1.76 to 25.00°                               | 1.73 to 25.00°                               | 3.59 to 26.00°                               |
| Index ranges                      | -11 ≤ h ≤ 10<br>-12 ≤ k ≤ 13<br>-13 ≤ l ≤ 14 | -14 ≤ h ≤ 14<br>-18 ≤ k ≤ 21<br>-13 ≤ l ≤ 12 | -11 ≤ h ≤ 11<br>-12 ≤ k ≤ 14<br>-14 ≤ l ≤ 14 |
| Reflections collected             | 6014                                         | 12440                                        | 7617                                         |
| Independent reflections           | 3988 [R(int) = 0.0250]                       | 4257 [R(int) = 0.0329]                       | 4350 [R(int) = 0.0251]                       |
| Completeness to theta = 25.00°    | 99.5%                                        | 99.9%                                        | 99.7%                                        |
| Absorption correction             | Semi-empirical from equivalents              | Semi-empirical from equivalents              | Semi-empirical from equivalents              |
| Max. and min. transmission        | 0.992 and 0.988                              | 0.988 and 0.982                              | 1.00000 and 0.74517                          |
| Refinement method                 | Full-matrix least-squares on F <sup>2</sup>  | Full-matrix least-squares on F <sup>2</sup>  | Full-matrix least-squares on F <sup>2</sup>  |
| Data / restraints / parameters    | 3988 / 1 / 280                               | 4257 / 0 / 289                               | 4350 / 0 / 295                               |
| Goodness-of-fit on F <sup>2</sup> | 1.005                                        | 1.004                                        | 1.012                                        |
| Final R indices [I > 2σ(I)]       | R1 = 0.0748, wR2 = 0.1454                    | R1 = 0.0505, wR2 = 0.1202                    | R1 = 0.0303, wR2 = 0.0653                    |
| R indices (all data)              | R1 = 0.1365, wR2 = 0.1620                    | R1 = 0.0772, wR2 = 0.1302                    | R1 = 0.0361, wR2 = 0.0674                    |

Largest diff. peak and hole      0.741 and -0.701 e.Å<sup>-3</sup>      0.570 and -0.275 e.Å<sup>-3</sup>      0.307 and -0.490 e.Å<sup>-3</sup>

Table S2. Crystal data and structure refinement for complexes **7**, **11**, **14**

| complex                           | [(L <sup>1</sup> ) <sub>2</sub> Mg] ( <b>7</b> )                | [(L <sup>1</sup> ) <sub>2</sub> Zn] ( <b>11</b> )                | [(L <sup>4</sup> ) <sub>2</sub> Zn] ( <b>14</b> )                |
|-----------------------------------|-----------------------------------------------------------------|------------------------------------------------------------------|------------------------------------------------------------------|
| Empirical formula                 | C <sub>32</sub> H <sub>42</sub> MgN <sub>8</sub> O <sub>2</sub> | C <sub>32</sub> H <sub>42</sub> N <sub>8</sub> O <sub>2</sub> Zn | C <sub>42</sub> H <sub>46</sub> N <sub>8</sub> O <sub>2</sub> Zn |
| Formula weight                    | 595.04                                                          | 636.10                                                           | 760.24                                                           |
| Temperature                       | 150.00(10) K                                                    | 150.01(10) K                                                     | 293(2) K                                                         |
| Wavelength                        | 0.71073 Å                                                       | 0.71073 Å                                                        | 0.71073 Å                                                        |
| Crystal system                    | Orthorhombic                                                    | Orthorhombic                                                     | Monoclinic                                                       |
| Space group                       | Pccn                                                            | Pccn                                                             | Cc                                                               |
| a/Å                               | 9.4589(2)                                                       | 21.373(4)                                                        | 19.6751(16)                                                      |
| β/Å                               | 21.5370(5)                                                      | 9.3047(19)                                                       | 10.1156(8)                                                       |
| γ/Å                               | 15.3073(4)                                                      | 15.635(3)                                                        | 21.2181(17)                                                      |
| a/°                               | 90                                                              | 90                                                               | 90                                                               |
| b/°                               | 90                                                              | 90                                                               | 117.1240(10)                                                     |
| c/°                               | 90                                                              | 90                                                               | 90                                                               |
| Volume                            | 3118.35(13) Å <sup>3</sup>                                      | 3109.3(11) Å <sup>3</sup>                                        | 3758.5(5) Å <sup>3</sup>                                         |
| Z                                 | 4                                                               | 4                                                                | 4                                                                |
| Density (calculated)              | 1.267 Mg/m <sup>3</sup>                                         | 1.359 Mg/m <sup>3</sup>                                          | 1.344 Mg/m <sup>3</sup>                                          |
| Absorption coefficient            | 0.100 mm <sup>-1</sup>                                          | 0.833 mm <sup>-1</sup>                                           | 0.702 mm <sup>-1</sup>                                           |
| F(000)                            | 1272                                                            | 1344                                                             | 1600                                                             |
| Crystal size                      | 0.32 x 0.26 x 0.24 mm <sup>3</sup>                              | 0.20 x 0.16 x 0.14 mm <sup>3</sup>                               | 0.18 x 0.15 x 0.12 mm <sup>3</sup>                               |
| Theta range for data collection   | 3.16 to 25.00°                                                  | 3.40 to 25.00°                                                   | 2.33 to 25.00°                                                   |
| Index ranges                      | -11<=h<=6<br>-25<=k<=11<br>-8<=l<=18                            | -25<=h<=22<br>-7<=k<=11<br>-18<=l<=16                            | -23<=h<=22<br>-10<=k<=12<br>-24<=l<=25                           |
| Reflections collected             | 6749                                                            | 7310                                                             | 9573                                                             |
| Independent reflections           | 2761 [R(int) = 0.0270]                                          | 2751 [R(int) = 0.0463]                                           | 5824 [R(int) = 0.0239]                                           |
| Completeness to theta = 25.00°    | 99.8 %                                                          | 99.7 %                                                           | 99.9 %                                                           |
| Absorption correction             | Semi-empirical from equivalents                                 | Semi-empirical from equivalents                                  | Semi-empirical from equivalents                                  |
| Max. and min. transmission        | 1.00000 and 0.72566                                             | 1.00000 and 0.87670                                              | 1.00000 and 0.71787                                              |
| Refinement method                 | Full-matrix least-squares on F <sup>2</sup>                     | Full-matrix least-squares on F <sup>2</sup>                      | Full-matrix least-squares on F <sup>2</sup>                      |
| Data / restraints / parameters    | 2761 / 0 / 243                                                  | 2751 / 2 / 237                                                   | 5824 / 2 / 479                                                   |
| Goodness-of-fit on F <sup>2</sup> | 1.005                                                           | 1.002                                                            | 1.008                                                            |
| Final R indices [I>2σ(I)]         | R1 = 0.0449, wR2 = 0.1153                                       | R1 = 0.0452, wR2 = 0.0859                                        | R1 = 0.0356, wR2 = 0.0777                                        |
| R indices (all data)              | R1 = 0.0560, wR2 = 0.1215                                       | R1 = 0.0694, wR2 = 0.0972                                        | R1 = 0.0428, wR2 = 0.0801                                        |
| Largest diff. peak and hole       | 0.306 and -0.263 e.Å <sup>-3</sup>                              | 0.326 and -0.434 e.Å <sup>-3</sup>                               | 0.283 and -0.226 e.Å <sup>-3</sup>                               |

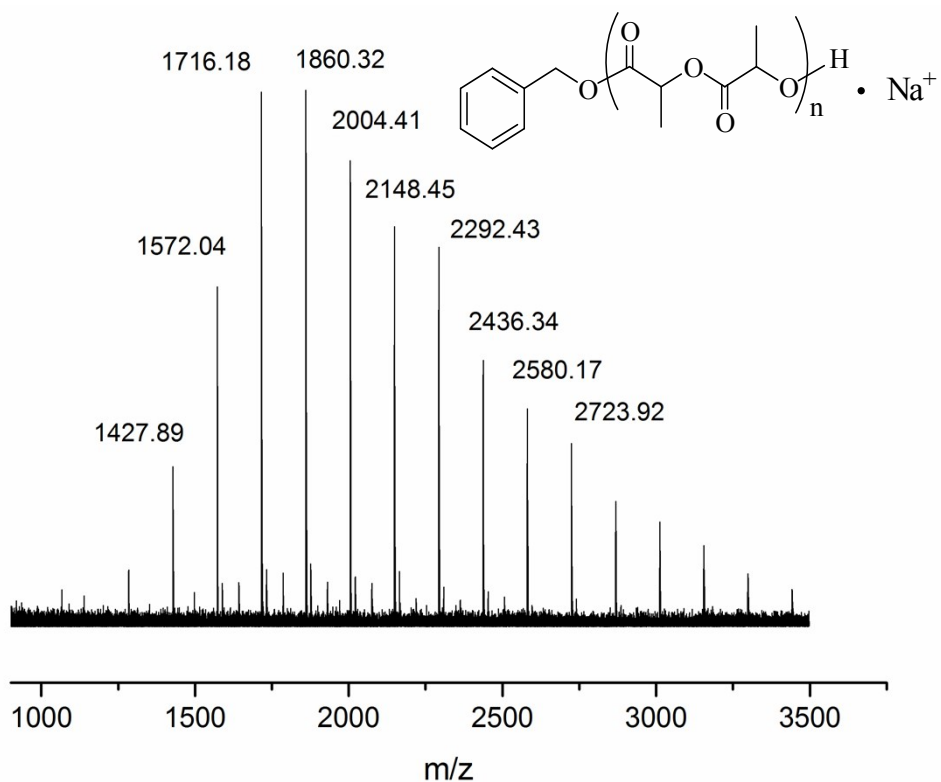

Fig. S1 MALDI-TOF spectrum of the oligo(L-lactide)s PLLA-15 prepared by complex 5.

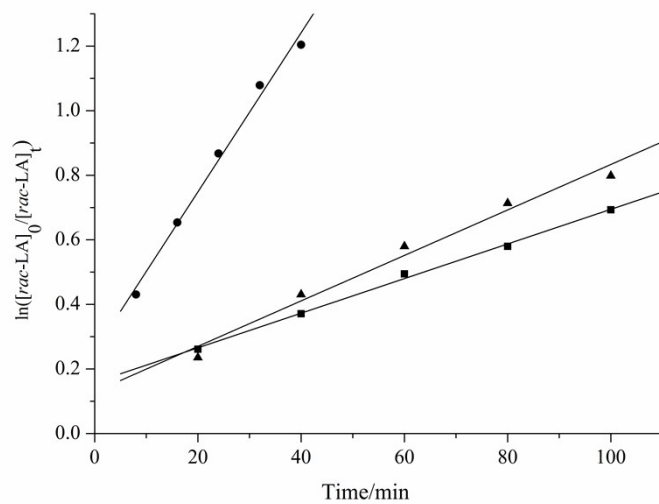

Fig. S2 Plots of  $\ln([rac-LA]_0/[rac-LA]_t)$  versus time catalyzed by **1** (■), **2** (▲) and **3** (●). Conditions:  $[LA]_0/[Cat.] = 100 : 1$ ,  $[LA]_0 = 0.5$  M, THF, 30 °C.  $k_{obs(■)} = 0.0054$  min<sup>-1</sup>,  $k_{obs(▲)} = 0.0070$  min<sup>-1</sup>,  $k_{obs(●)} = 0.0246$  min<sup>-1</sup>.

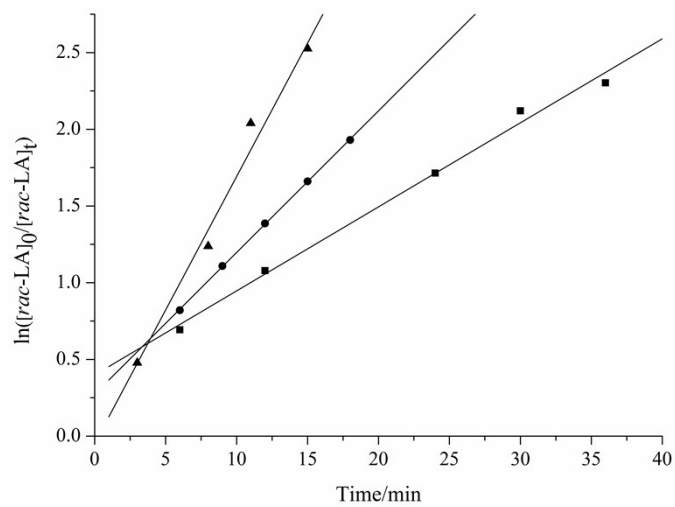

**Fig. S3** Plots of  $\ln([rac-LA]_0/[rac-LA]_t)$  versus time catalyzed by 4 (■), 5 (●) and 6 (▲). Conditions:  $[rac-LA]_0/[Cat.] = 200:1$ ;  $[rac-LA]_0 = 0.5$  M, THF,  $0^\circ\text{C}$ .  $k_{\text{obs}(\blacksquare)} = 0.0548 \text{ min}^{-1}$ ,  $k_{\text{obs}(\bullet)} = 0.0923 \text{ min}^{-1}$ ,  $k_{\text{obs}(\blacktriangle)} = 0.1739 \text{ min}^{-1}$ .

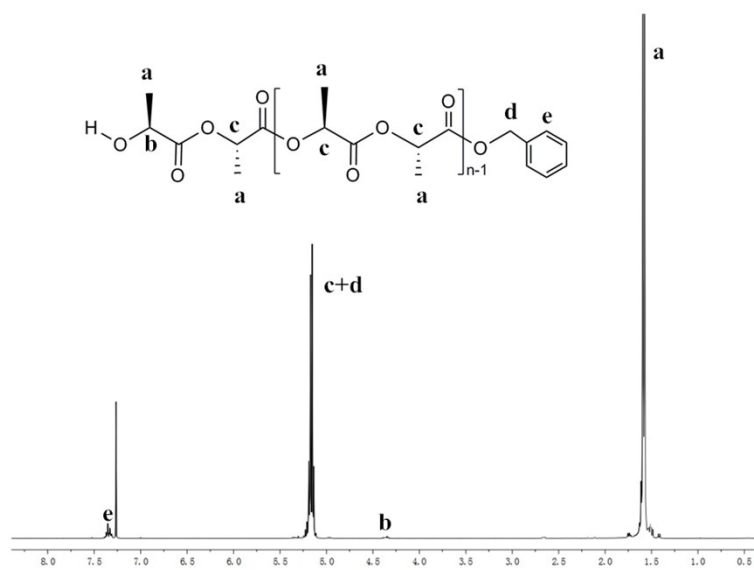

**Fig. S4**  $^1\text{H}$  NMR spectrum of PLLA-50 catalyzed by  $[\text{Mg}(\text{L}^1)_2]$  (7) in the presence of BnOH.

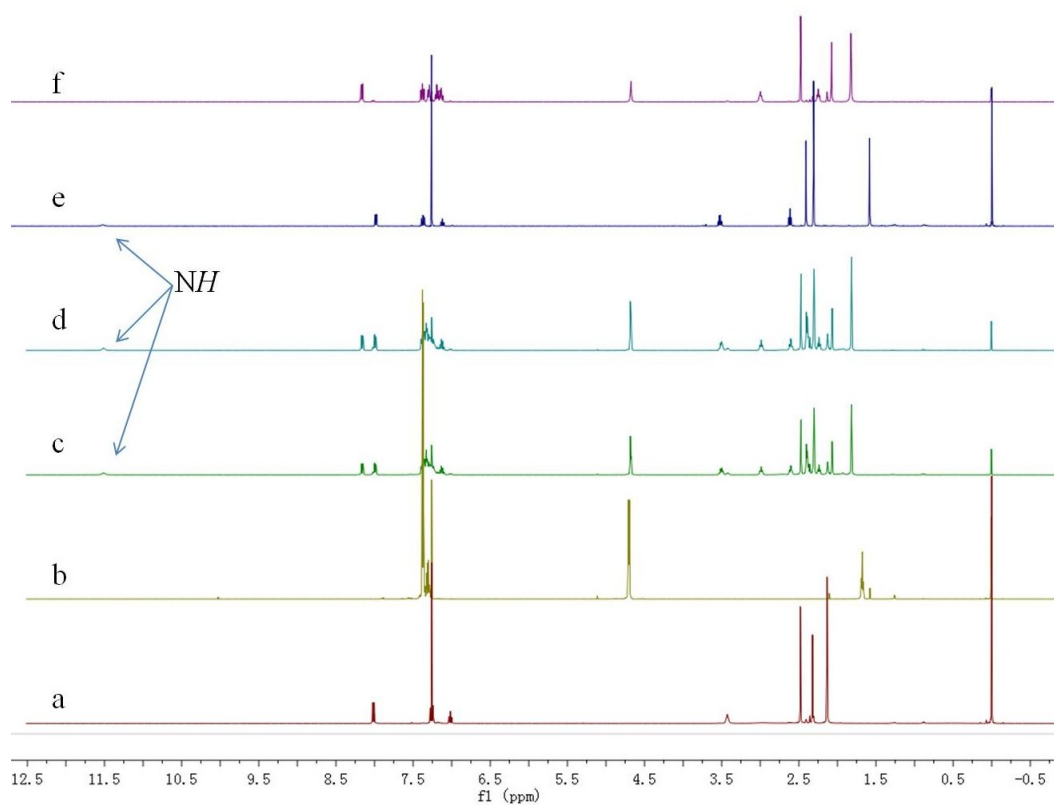

**Fig. S5** <sup>1</sup>H NMR spectroscopic studies of reaction of [Mg(L<sup>1</sup>)<sub>2</sub>] (7) with 2 equiv of BnOH in CDCl<sub>3</sub>. a) pure [Mg(L<sup>1</sup>)<sub>2</sub>]; b) pure BnOH; c) [Mg(L<sup>1</sup>)<sub>2</sub>] + 2BnOH 5min; d) [Mg(L<sup>1</sup>)<sub>2</sub>] + 2BnOH 50min; e) pure L<sup>1</sup>-H; f) pure [(L<sup>1</sup>)<sub>2</sub>Mg<sub>2</sub>(μ-OBn)<sub>2</sub>] (1).
